# Supplementary material
Source: PubMed Central journal article supplement (PMC1062881)

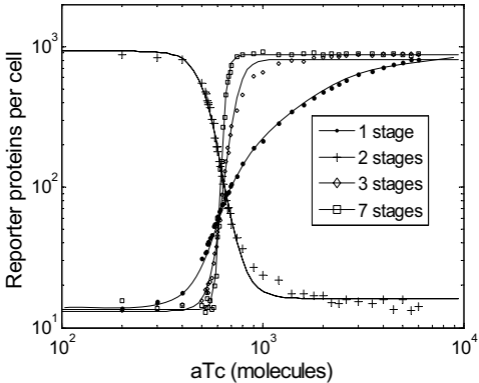

Supplement: pnas_102_10_3581__2.pdf [file pnas_102_10_3581__2.pdf]

A

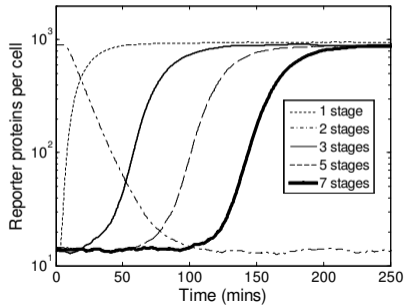

B

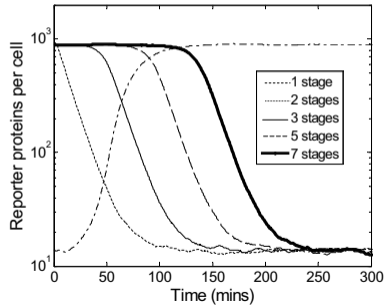

C

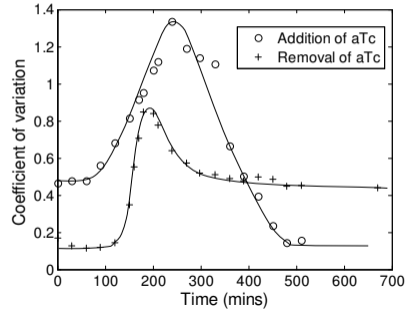

Supplement: pnas_102_10_3581__3.pdf [file pnas_102_10_3581__3.pdf]

A

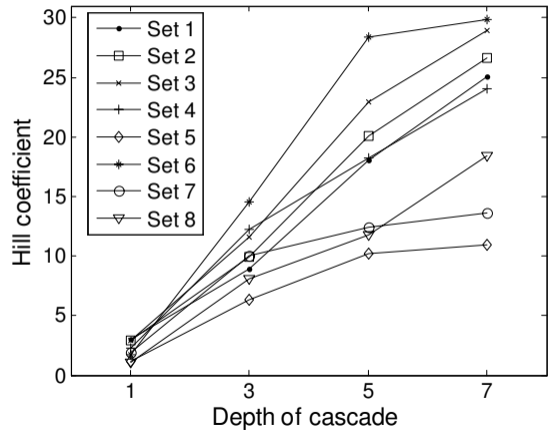

B

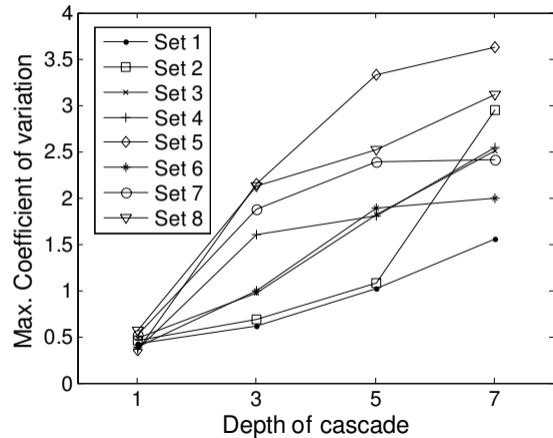

Supplement: pnas_102_10_3581__4.pdf [file pnas_102_10_3581__4.pdf]

A

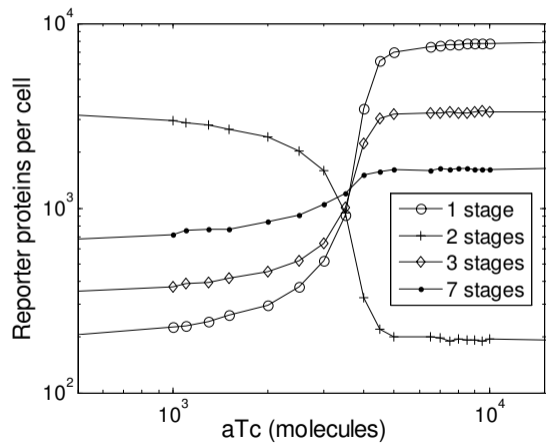

B

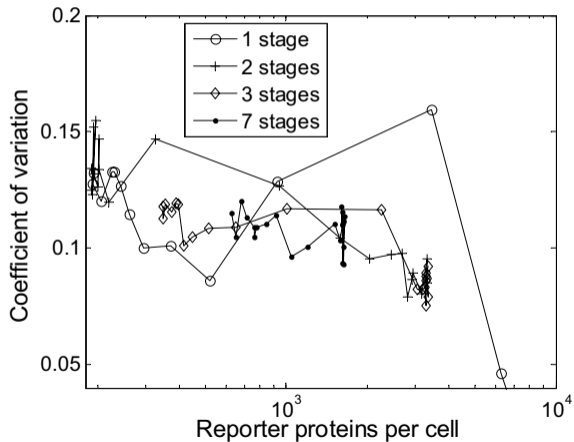

Supplement: pnas_102_10_3581__5.pdf [file pnas_102_10_3581__5.pdf]

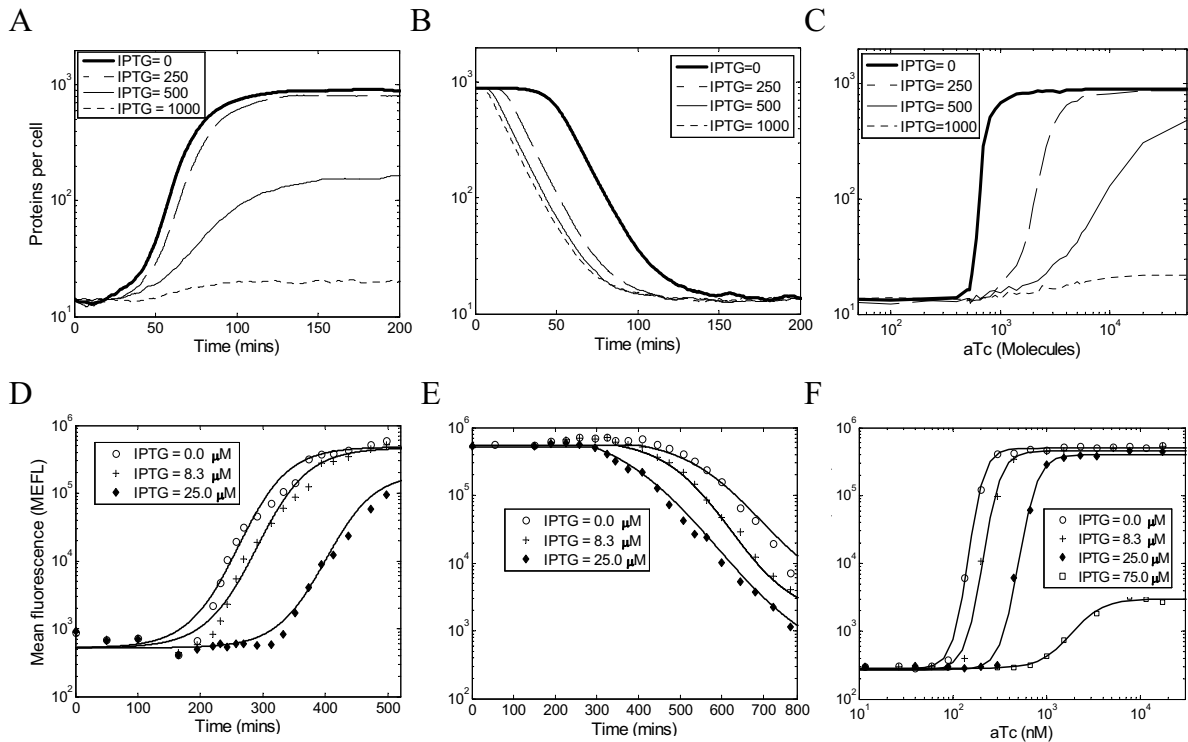

Supplement: pnas_102_10_3581__6.pdf [file pnas_102_10_3581__6.pdf]
